# Supplementary material for: A systematic strategy for screening therapeutic constituents of Schisandra chinensis (Turcz.) Baill infiltrated blood–brain barrier oriented in lesions using ethanol and water extracts: a novel perspective for exploring chemical material basis of herb medicines
Source: PubMed Central journal article supplement — Acta Pharm Sin B. 2019 Oct 30;10(3):557–68. doi: 10.1016/j.apsb.2019.10.008 (PMC7049611; doi:10.1016/j.apsb.2019.10.008), 2019-10-30
Supplement: mmc1.pdf [file mmc1.pdf]

## Supporting Information for

### Short Communication

**A systematic strategy for screening therapeutic constituents of *Schisandra chinensis* (Turcz.) Baill infiltrated blood–brain barrier oriented in lesions using ethanol and water extracts: a novel perspective for exploring chemical material basis of herb medicines**

**Yiwen Zhang<sup>a</sup>, Xinyan Lv<sup>b</sup>, Jiameng Qu<sup>b</sup>, Xin Zhang<sup>a</sup>, Mingyang Zhang<sup>a</sup>, Hao Gao<sup>a</sup>, Qian Zhang<sup>a</sup>, Ran Liu<sup>a</sup>, Huarong Xu<sup>a</sup>, Qing Li<sup>a</sup>, Kaishun Bi<sup>a,\*</sup>**

<sup>a</sup>*School of Pharmacy, Shenyang Pharmaceutical University, Shenyang 110016, China*

<sup>b</sup>*School of Traditional Chinese Materia Medica, Shenyang Pharmaceutical University, Shenyang 110016, China*

Received 20 May 2019; received in revised form 3 September 2019; accepted 14 October 2019

\*Corresponding author. Tel.: +86 24 23986012; fax: +86 24 23986259.

E-mail address: [kaishunbi.syphu@gmail.com](mailto:kaishunbi.syphu@gmail.com) (Kaishun Bi).

## Table of contents

|                                                                                                                                                                                                                                                                |    |
|----------------------------------------------------------------------------------------------------------------------------------------------------------------------------------------------------------------------------------------------------------------|----|
| <b>Table S1</b> Chronic unpredictable stress procedure.....                                                                                                                                                                                                    | 3  |
| <b>Table S2</b> Optimized multiple-reaction-monitoring (MRM) parameters for all samples. ....                                                                                                                                                                  | 4  |
| <b>Table S3</b> The calibration parameters of analytes. ....                                                                                                                                                                                                   | 4  |
| <b>Table S4</b> Summary of precision of analytes in rat brain ( $n = 6$ ).....                                                                                                                                                                                 | 4  |
| <b>Table S5</b> Summary of accuracy of analytes in rat brain ( $n = 6$ ). ....                                                                                                                                                                                 | 4  |
| <b>Table S6</b> Summary of matrix effect of analytes in rat brain ( $n = 6$ ).....                                                                                                                                                                             | 4  |
| <b>Table S7</b> Stability of analytes in brain at different conditions ( $n = 3$ ).....                                                                                                                                                                        | 5  |
| <b>Table S8</b> Precision, repeatability and stability in the method validation of contents <i>in vitro</i> ....                                                                                                                                               | 5  |
| <b>Table S9</b> Precision, repeatability and stability in the method validation of contents <i>in vivo</i> . ...                                                                                                                                               | 5  |
| <b>Figure S1</b> The experimental design of our study.....                                                                                                                                                                                                     | 6  |
| <b>Figure S2</b> Typical LC–MS MRM chromatograms of (A) reference standard solution of analytes and IS. (B) 5-HT, DA and NE in rat brain sample. ....                                                                                                          | 6  |
| <b>Figure S3</b> Structures of the components of <i>S. chinensis</i> . ....                                                                                                                                                                                    | 8  |
| <b>Figure S4</b> Results of 9 reference standards:7, schisandrol A; 9, gomisin D; 11, gomisin J; 12, gomisin O; 13, epigomisin O; 16, schisandrol B; 30, schisandrin A; 31, gomisin N; 32, schisandrin B (the numbers represent the peak No. in Table 2). .... | 9  |
| <b>Figure S5</b> Proposed metabolic pathways of transform process between schisandrol A, schisandrol B, schisandrin A, schisandrin B. ....                                                                                                                     | 9  |
| <b>Figure S6</b> The active ingredients of <i>S. chinensis</i> protect against oxidative stress and inflammation in CNS diseases. ....                                                                                                                         | 10 |

**Table S1** Chronic unpredictable stress procedure.

| Day | Stressor                                                         |                                                                  |                                                                  |
|-----|------------------------------------------------------------------|------------------------------------------------------------------|------------------------------------------------------------------|
|     | Morning                                                          | Afternoon                                                        | Night                                                            |
| 1   | Cage tilting (45°, 6 h)                                          | Sawdust-free cage (12 h)                                         | Overnight illumination                                           |
| 2   | Electric shock (0.8 mA, 5 s duration, 60 s inter-shock interval) | –                                                                | Water deprivation (overnight)                                    |
| 3   | Soiled cage (200 mL water sprinkled on sawdust bedding for 12 h) | –                                                                | Food deprivation (overnight)                                     |
| 4   | Restraint stress                                                 | Horizontal shaking cage (30min)                                  | White noise (30 min)                                             |
| 5   | Cold swimming (10 °C)                                            | –                                                                | Sawdust-free cage (12 h)                                         |
| 6   | Sawdust-free cage (12 h)                                         | Electric shock (0.8 mA, 5 s duration, 60 s inter-shock interval) | –                                                                |
| 7   | Horizontal shaking cage (30 min)                                 | Cage tilting (45°, 6 h)                                          | –                                                                |
| 8   | White noise (30 min)                                             | Electric shock (0.8 mA, 5 s duration, 60 s inter-shock interval) | –                                                                |
| 9   | Soiled cage (200 mL water sprinkled on sawdust bedding for 12 h) | Horizontal shaking cage (30 min)                                 | Overnight illumination                                           |
| 10  | Water deprivation (12 h)                                         | –                                                                | Eage tilting (45°, 6 h)                                          |
| 11  | Restraint stress                                                 | Cold swimming (10 °C)                                            | –                                                                |
| 12  | Electric shock (0.8 mA, 5 s duration, 60 s inter-shock interval) | Horizontal shaking cage (30 min)                                 | Food deprivation (overnight)                                     |
| 13  | Sawdust-free cage (12 h)                                         | White noise (30 min)                                             | –                                                                |
| 14  | Horizontal shaking cage (30 min)                                 | Restraint stress                                                 | Soiled cage (200 mL water sprinkled on sawdust bedding for 12 h) |

–Not applicable.

**Table S2** Optimized multiple-reaction-monitoring (MRM) parameters for all samples.

| Analyte           | Mode ( $\pm$ ) | Q1 (amu) | Q3 (amu) | DP (V) | CE (eV) | $t_R$ (min) |
|-------------------|----------------|----------|----------|--------|---------|-------------|
| NE                | +              | 170.1    | 152.0    | 38     | 21      | 2.01        |
| 5-HT              | +              | 177.2    | 160.2    | 43     | 12      | 2.23        |
| DA                | +              | 154.1    | 137.1    | 42     | 14      | 2.58        |
| Isoprenaline (IS) | +              | 212.0    | 194.0    | 46     | 12      | 2.82        |

**Table S3** The calibration parameters of analytes.

| Analyte | Liner range ( $\mu\text{g/mL}$ ) | Slope                  | Intercept              | Regression coefficient ( $R$ ) |
|---------|----------------------------------|------------------------|------------------------|--------------------------------|
| DA      | 1.00–200                         | $7.340 \times 10^{-2}$ | $2.375 \times 10^{-2}$ | 0.9962                         |
| NE      | 5.00–1000                        | $1.795 \times 10^{-2}$ | $4.833 \times 10^{-1}$ | 0.9953                         |
| 5-HT    | 5.00–1000                        | $6.060 \times 10^{-2}$ | $6.775 \times 10^{-2}$ | 0.9977                         |

**Table S4** Summary of precision of analytes in rat brain ( $n = 6$ ).

| Analyte | Intra-day (RSD, %) |     |        |      | Inter-day (RSD, %) |     |        |      |
|---------|--------------------|-----|--------|------|--------------------|-----|--------|------|
|         | LLOQ               | Low | Medium | High | LLOQ               | Low | Medium | High |
| DA      | 6.0                | 3.4 | 4.6    | 7.6  | 13.8               | 4.4 | 10.5   | 8.7  |
| NE      | 12.6               | 5.4 | 9.8    | 6.5  | 10.3               | 5.6 | 7.5    | 1.9  |
| 5-HT    | 15.8               | 8.7 | 4.3    | 5.0  | 12.5               | 4.9 | 6.4    | 8.5  |

**Table S5** Summary of accuracy of analytes in rat brain ( $n = 6$ ).

| Analyte | Intra-day (RE, %) |      |        |      | Inter-day (RE, %) |      |        |      |
|---------|-------------------|------|--------|------|-------------------|------|--------|------|
|         | LLOQ              | Low  | Medium | High | LLOQ              | Low  | Medium | High |
| DA      | 8.0               | 12.3 | -8.9   | 7.3  | 14.3              | 14.5 | 4.5    | -6.2 |
| NE      | -5.7              | 10.2 | 12.9   | -8.8 | -6.1              | 3.9  | 9.9    | 5.1  |
| 5-HT    | -1.2              | 7.7  | 4.3    | -3.4 | -9.3              | 4.6  | -6.2   | -6.6 |

**Table S6** Summary of matrix effect of analytes in rat brain ( $n = 6$ ).

| Analyte | IS-normalized MF (%) |        |       | RSD (%) |        |      |
|---------|----------------------|--------|-------|---------|--------|------|
|         | Low                  | Medium | High  | Low     | Medium | High |
| DA      | 110.4                | 91.8   | 98.1  | 12.5    | 12.1   | 7.1  |
| NE      | 96.7                 | 91.4   | 102.6 | 8.9     | 9.3    | 7.3  |
| 5-HT    | 90.8                 | 101.3  | 82.6  | 6.5     | 8.7    | 5.9  |

**Table S7** Stability of analytes in brain at different conditions ( $n = 3$ ).

| Analytes | −80 °C for a month<br>(RE, %) |      | Three freeze-thaw<br>cycles (RE, %) |       | 4 °C in autosampler<br>for 24 h (RE, %) |       | 1 week at r.t. for<br>derivatized analytes<br>(RE, %) |      |
|----------|-------------------------------|------|-------------------------------------|-------|-----------------------------------------|-------|-------------------------------------------------------|------|
|          | Low                           | High | Low                                 | High  | Low                                     | High  | Low                                                   | High |
| DA       | 12.1                          | −5.7 | 13.2                                | 8.9   | 12.8                                    | 6.8   | 7.2                                                   | 3.3  |
| NE       | 12.3                          | 11.3 | 6.9                                 | 9.8   | −2.3                                    | −10.3 | 1.1                                                   | 2.9  |
| 5-HT     | 10.6                          | 12.5 | −13.7                               | −10.4 | 3.8                                     | 4.8   | 2.5                                                   | 1.9  |

**Table S8** Precision, repeatability and stability in the method validation of contents *in vitro*.

| RT (min) | Fragment<br>ions ( $m/z$ ) | Precision<br>(RSD, %) |           | Repeatability<br>(RSD, %) |     | Stability<br>(RSD, %) |     |
|----------|----------------------------|-----------------------|-----------|---------------------------|-----|-----------------------|-----|
|          |                            | RT                    | Intensity | RT                        | RT  | Intensity             | RT  |
|          |                            |                       |           |                           |     |                       |     |
| 5.05     | 221.0583                   | 0.6                   | 3.3       | 0.2                       | 2.6 | 0.3                   | 2.9 |
| 16.82    | 419.1992                   | 0.5                   | 5.1       | 0.4                       | 2.6 | 0.8                   | 4.3 |
| 24.49    | 433.2148                   | 0.8                   | 4.4       | 0.0                       | 3.4 | 0.1                   | 2.5 |
| 31.90    | 417.1835                   | 0.0                   | 1.8       | 1.2                       | 0.9 | 0.8                   | 2.4 |
| 50.60    | 537.2046                   | 0.3                   | 2.2       | 1.5                       | 3.4 | 0.6                   | 4.5 |
| 62.02    | 403.2042                   | 0.7                   | 2.8       | 1.1                       | 1.9 | 0.9                   | 3.3 |
| 77.81    | 417.2199                   | 1.2                   | 4.8       | 0.6                       | 4.8 | 0.2                   | 4.6 |
| 85.09    | 385.1573                   | 0.5                   | 4.9       | 0.2                       | 1.9 | 0.0                   | 5.0 |

**Table S9** Precision, repeatability and stability in the method validation of contents *in vivo*.

| RT (min) | Fragment<br>ions ( $m/z$ ) | Precision<br>(RSD, %) |           | Repeatability<br>(RSD, %) |           | Stability<br>(RSD, %) |           |
|----------|----------------------------|-----------------------|-----------|---------------------------|-----------|-----------------------|-----------|
|          |                            | RT                    | Intensity | RT                        | Intensity | RT                    | Intensity |
|          |                            |                       |           |                           |           |                       |           |
| 5.05     | 221.0583                   | 0.5                   | 6.9       | 1.2                       | 7.1       | 1.0                   | 9.5       |
| 16.82    | 419.1992                   | 1.4                   | 10.1      | 0.7                       | 5.9       | 0.9                   | 4.8       |
| 24.49    | 433.2148                   | 0.9                   | 6.8       | 1.4                       | 7.8       | 0.8                   | 9.9       |
| 31.90    | 417.1835                   | 1.3                   | 8.2       | 0.7                       | 10.5      | 0.2                   | 9.1       |
| 50.60    | 537.2046                   | 0.6                   | 9.2       | 0.3                       | 6.2       | 0.6                   | 6.7       |
| 62.02    | 403.2042                   | 0.7                   | 5.9       | 1.5                       | 8.0       | 1.3                   | 7.9       |
| 77.81    | 417.2199                   | 1.0                   | 7.9       | 0.8                       | 9.1       | 0.7                   | 5.1       |
| 85.09    | 385.1573                   | 0.4                   | 10.8      | 0.3                       | 7.7       | 0.3                   | 10.2      |

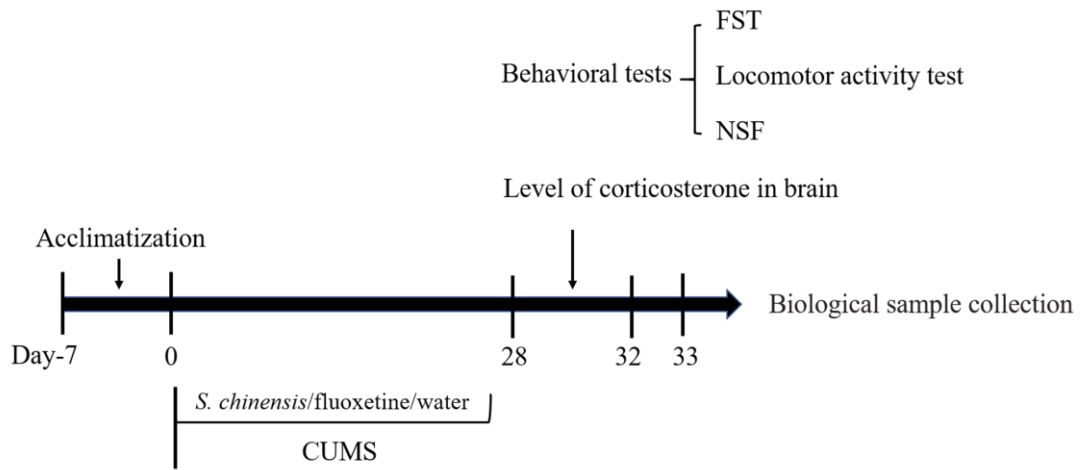

**Figure S1** The experimental design of our study.

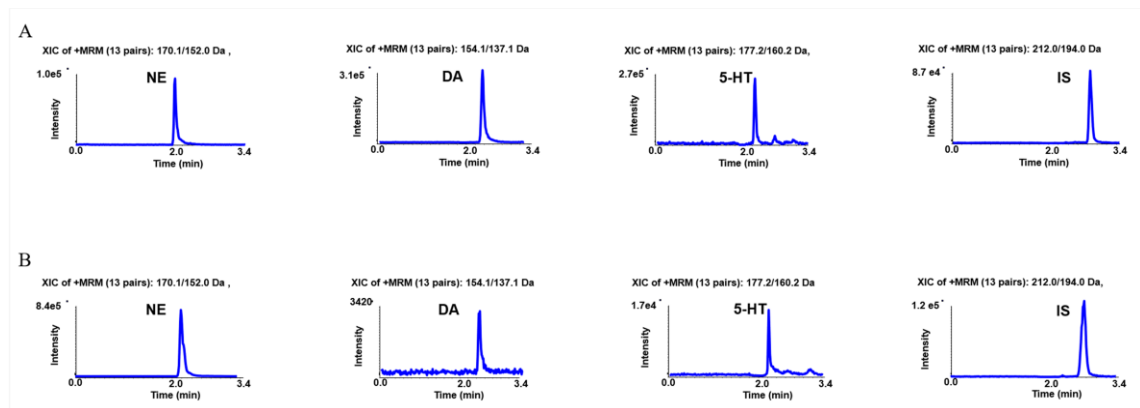

**Figure S2** Typical LC-MS MRM chromatograms of (A) reference standard solution of analytes and IS. (B) 5-HT, DA and NE in rat brain sample.

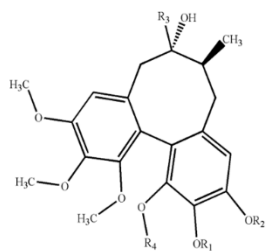

| Componund        | R <sub>1</sub>     | R <sub>2</sub> | R <sub>3</sub> | R <sub>4</sub> |
|------------------|--------------------|----------------|----------------|----------------|
| Schisandrol B    | —CH <sub>2</sub> — | Me             | Me             |                |
| Schisandrin A    | Me                 | Me             | H              | Me             |
| Angeloygomisin H | Me                 | Me             | OH             | Ang            |
| Tigloylgomisin H | Me                 | Me             | OH             | Tig            |
| Benzoylgomisin H | Me                 | Me             | Me             | Ben            |

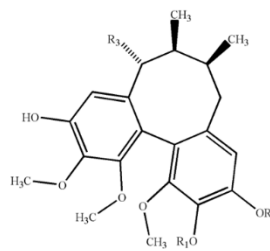

| Componund       | R <sub>1</sub>     | R <sub>2</sub> | R <sub>3</sub> |
|-----------------|--------------------|----------------|----------------|
| wilsonilignan C | —CH <sub>2</sub> — |                | OMe            |
| Gomisin O       | —CH <sub>2</sub> — |                | OH             |
| Gomisin N       | —CH <sub>2</sub> — |                | H              |
| Schisanhenol    | Me                 | Me             | H              |
| Gomisin S       | Me                 | Me             | OH             |

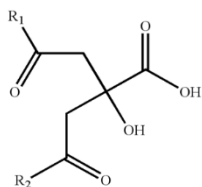

| Componund              | R <sub>1</sub> | R <sub>2</sub> |
|------------------------|----------------|----------------|
| Citric acid            | OH             | OH             |
| 1,5 - Dimethyl citrate | Me             | Me             |

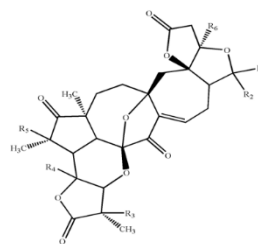

| Componund          | R <sub>1</sub> | R <sub>2</sub> | R <sub>3</sub> | R <sub>4</sub> | R <sub>5</sub> | R <sub>6</sub> |
|--------------------|----------------|----------------|----------------|----------------|----------------|----------------|
| Schindilactone A   | Me             | Me             | H              | H              | H              | OH             |
| Lancifodilactone C | Me             | Me             | H              | H              | H              | H              |

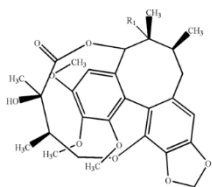

| Componund | R <sub>1</sub> |
|-----------|----------------|
| Gomisin D | OH             |
| Gomisin E | H              |

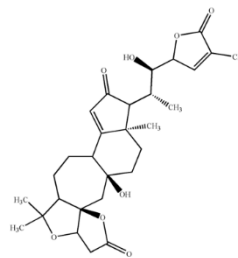

Propindilactone G

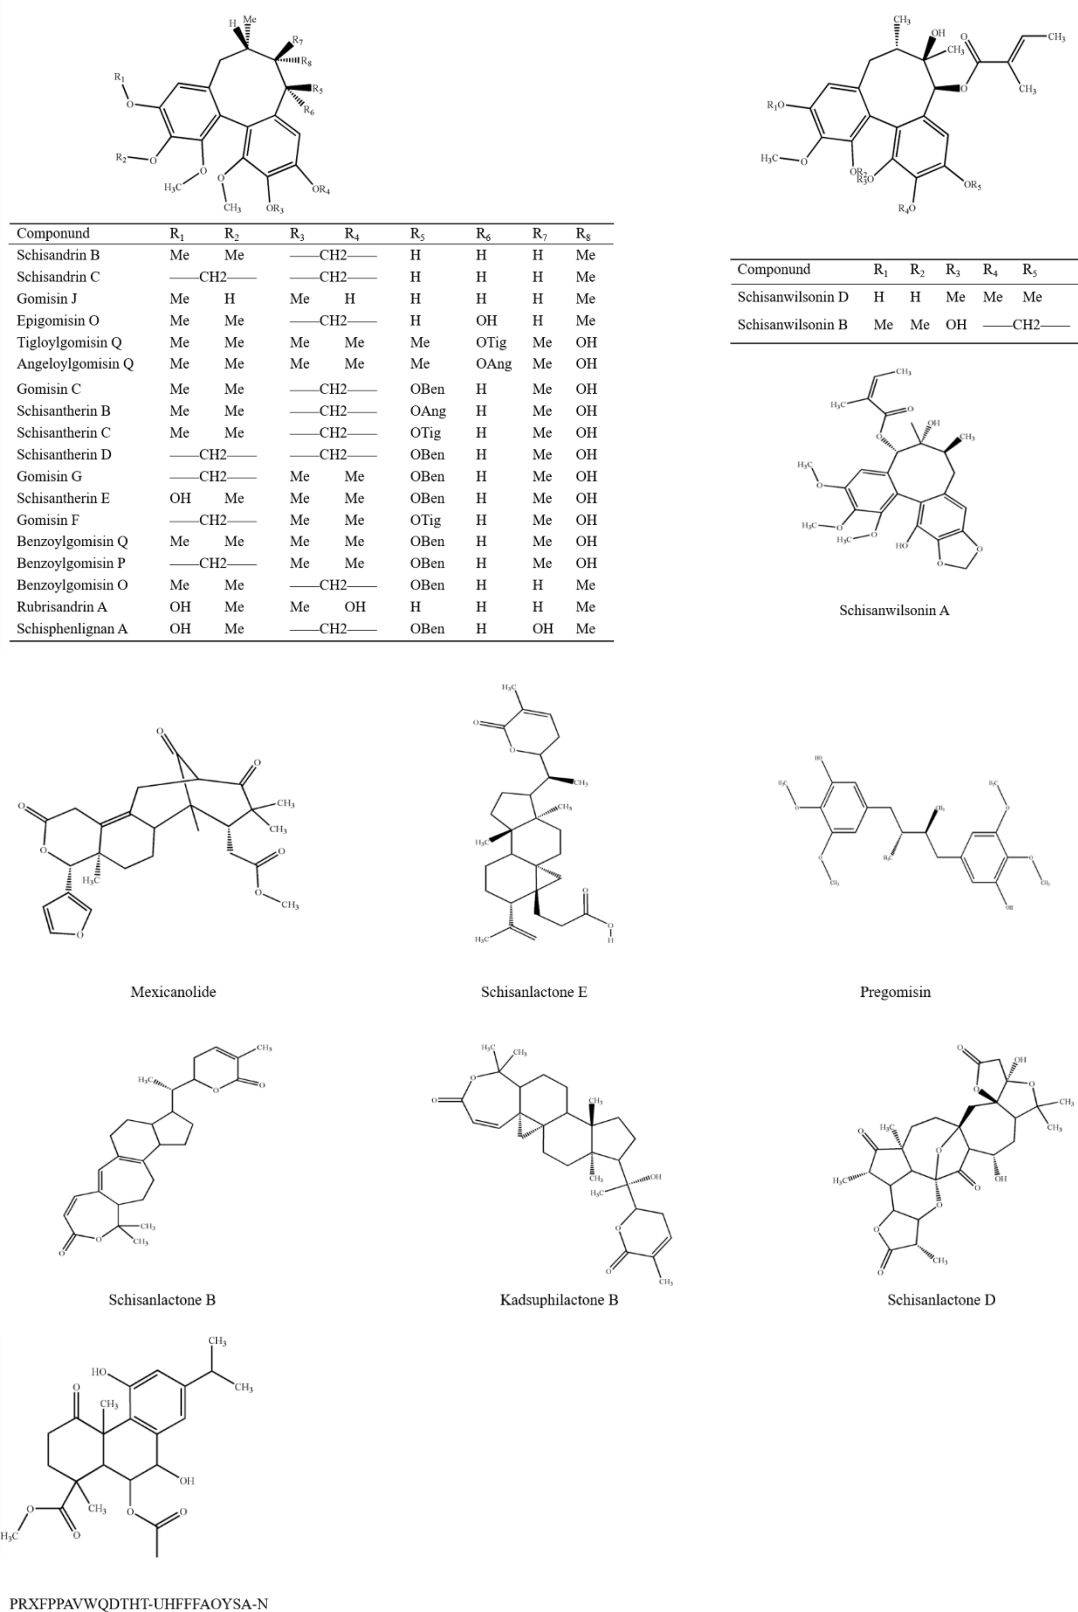

**Figure S3** Structures of the components of *S. chinensis*.



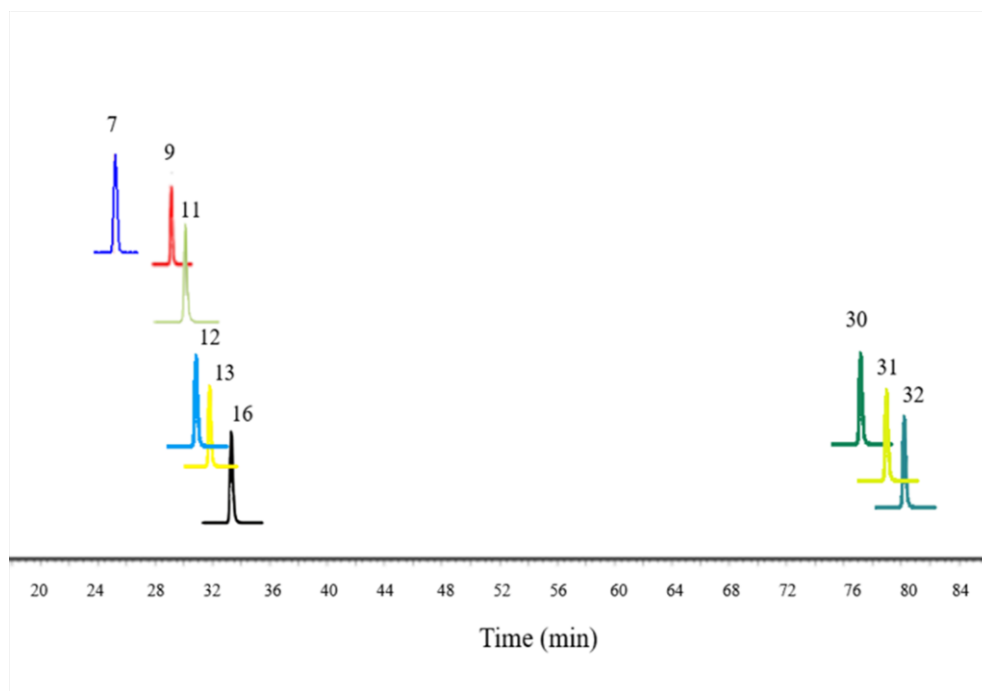

**Figure S4** Results of 9 reference standards: 7, schisandrol A; 9, gomisin D; 11, gomisin J; 12, gomisin O; 13, epigomisin O; 16, schisandrol B; 30, schisandrin A; 31, gomisin N; 32, schisandrin B (the numbers represent the peak No. in Table 2).

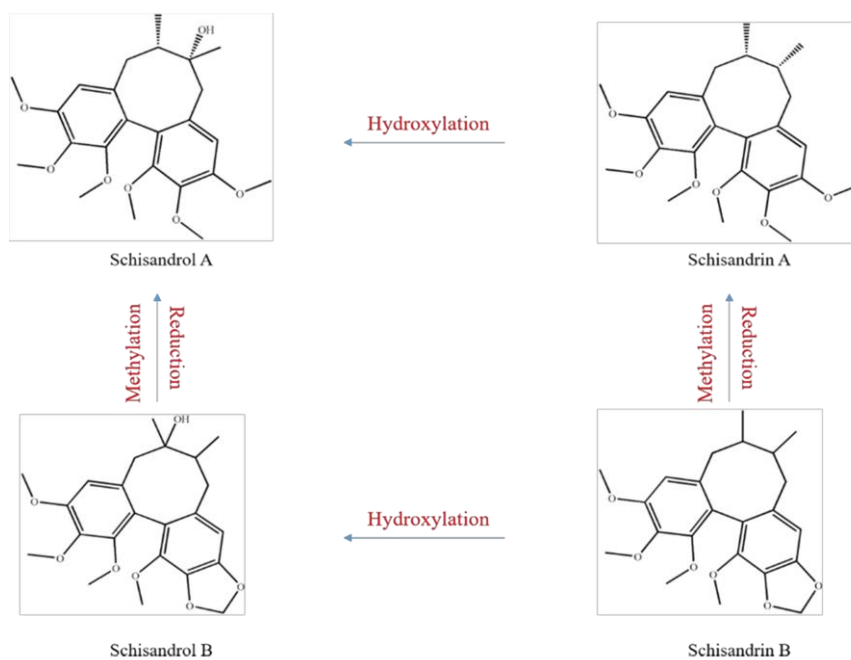

**Figure S5** Proposed metabolic pathways of transform process between schisandrol A, schisandrol B, schisandrin A, schisandrin B.

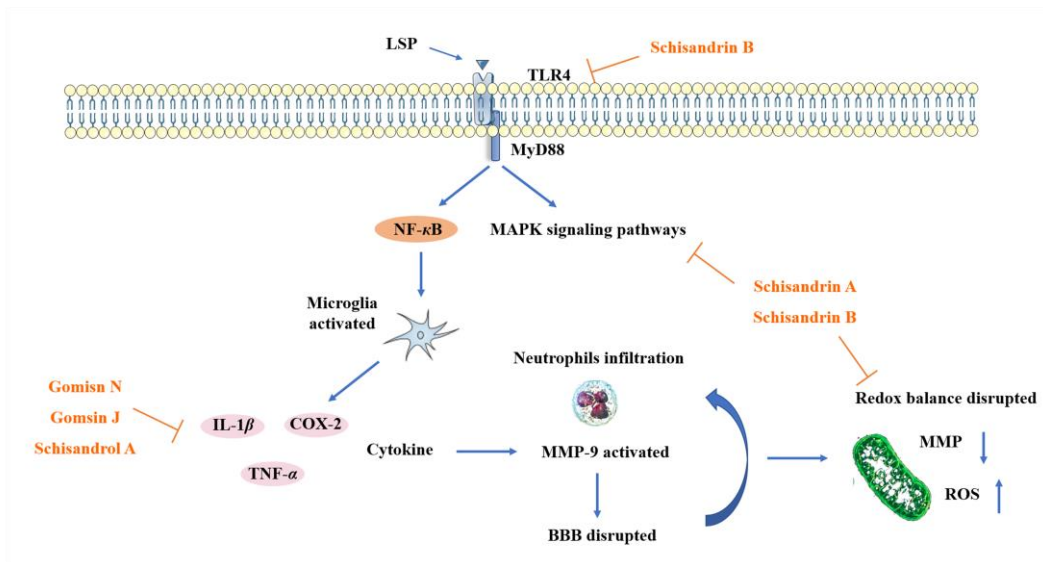

**Figure S6** The active ingredients of *S. chinensis* protect against oxidative stress and inflammation in CNS diseases.
